# Supplementary material for: FCHO1 Is a Prognostic Biomarker of Colon Adenocarcinoma and Associated with Immune Infiltration and Glycolysis
Source: Research Square preprint supplement (doi:10.21203/rs.3.rs-1415166/v1), 2022-03-08
Supplement: Supplementary file 1 [file b3adb30fd2dcfd208f4523a9.docx]

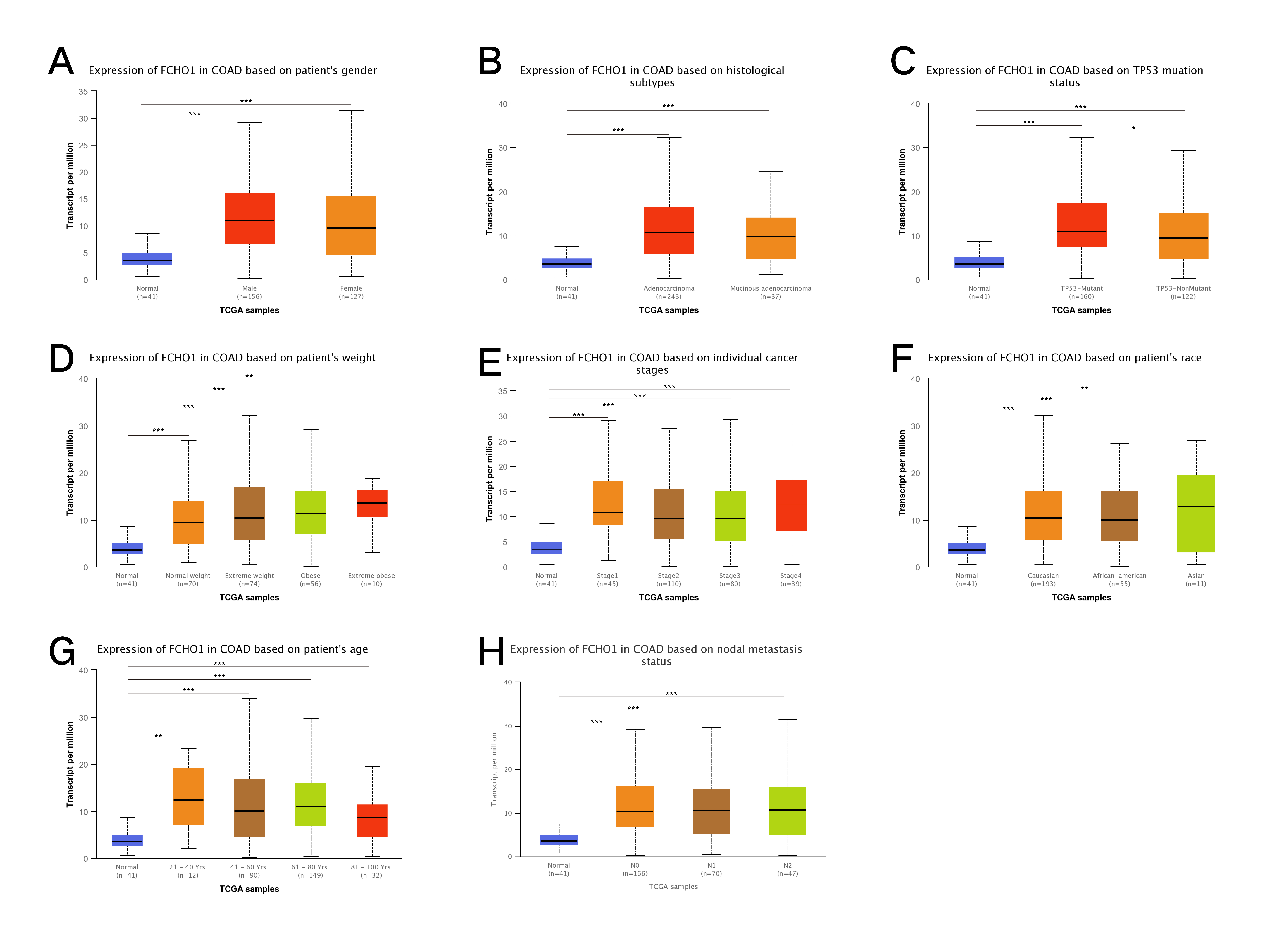


Figure 1 (A-H) The expression of FCHO1 in different clinical stages and types of colon tumors and normal tissues was analyzed by UALCAN database.


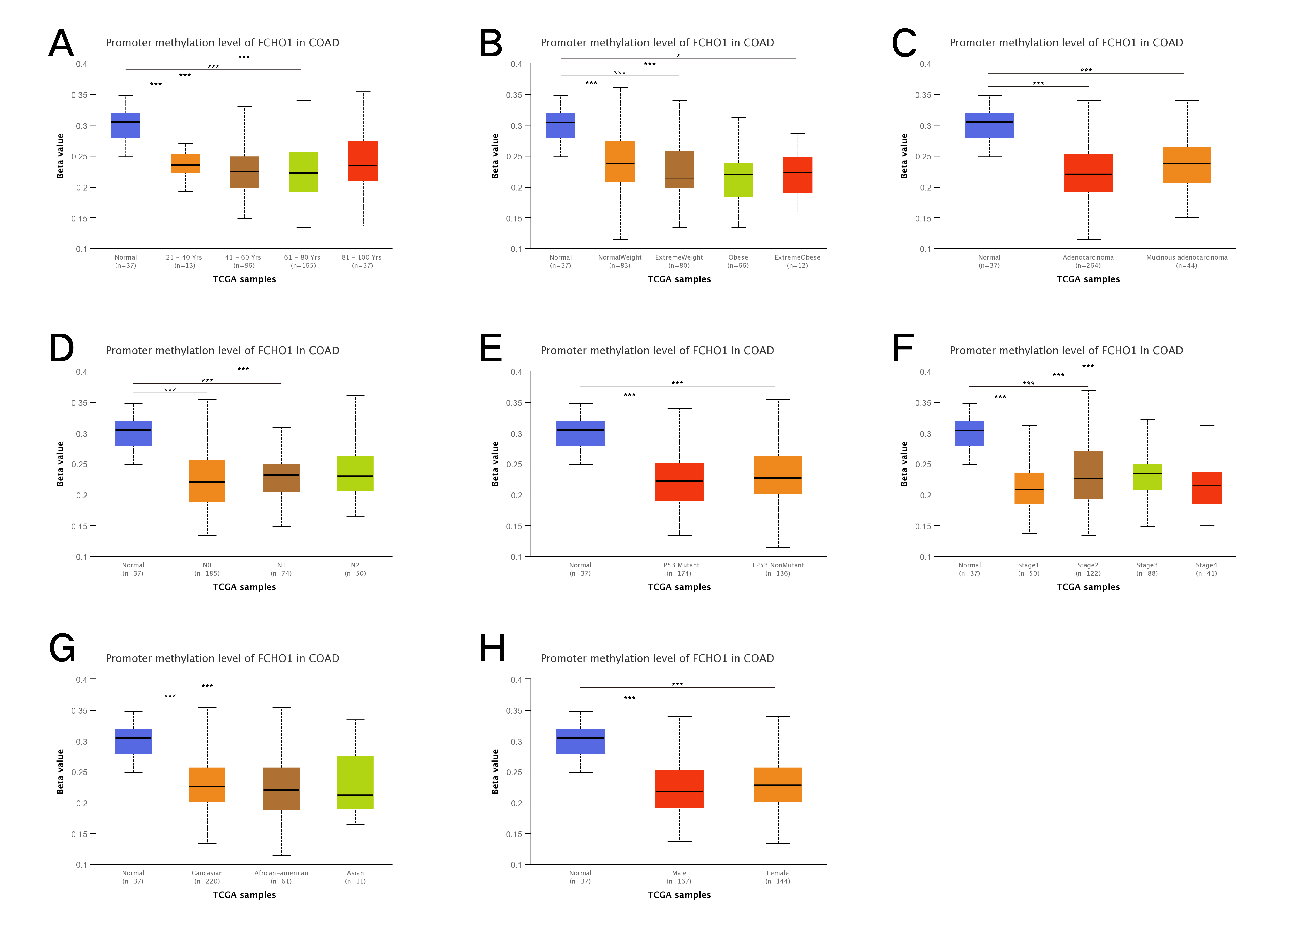


Figure 2 (A-H) The expression of FCHO1 methylation in different clinical stages and types in colon tumors and normal tissues was analyzed by UALCAN database.
